# Supplementary figures and images for: Modeling the consequences of the dikaryotic life cycle of mushroom-forming fungi on genomic conflict
Source: eLife journal article supplement (doi:10.7554/elife.75917), 2022-04-20

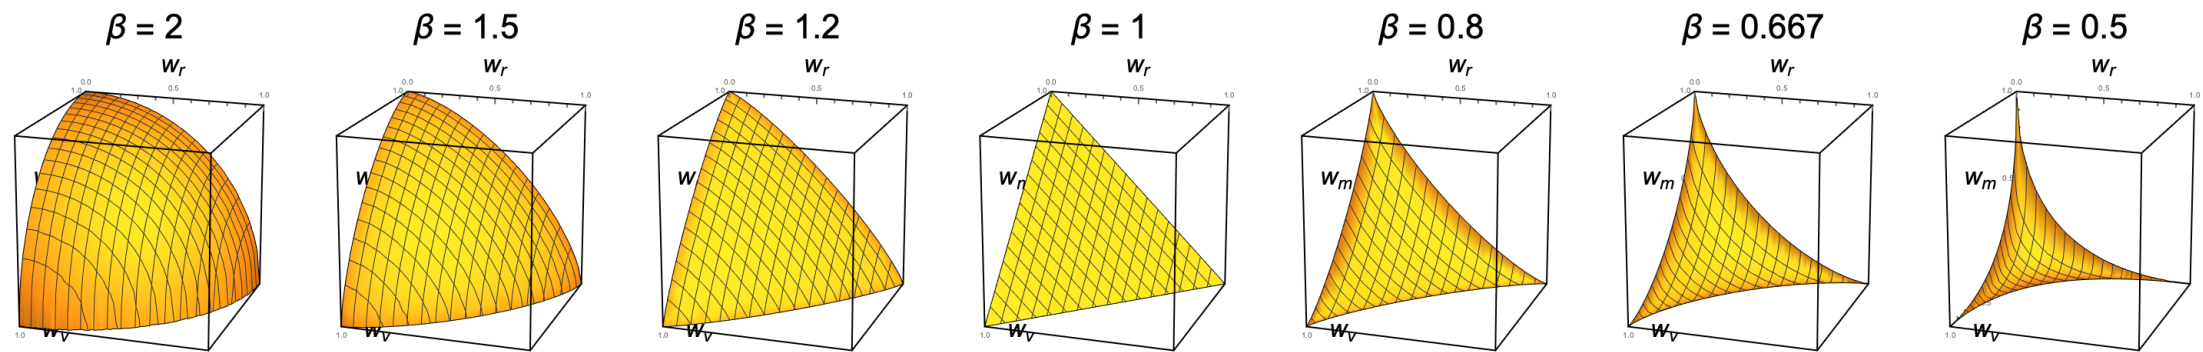

Linkage = 0.0 (free recombination)

Linkage = 1.0 (no recombination)

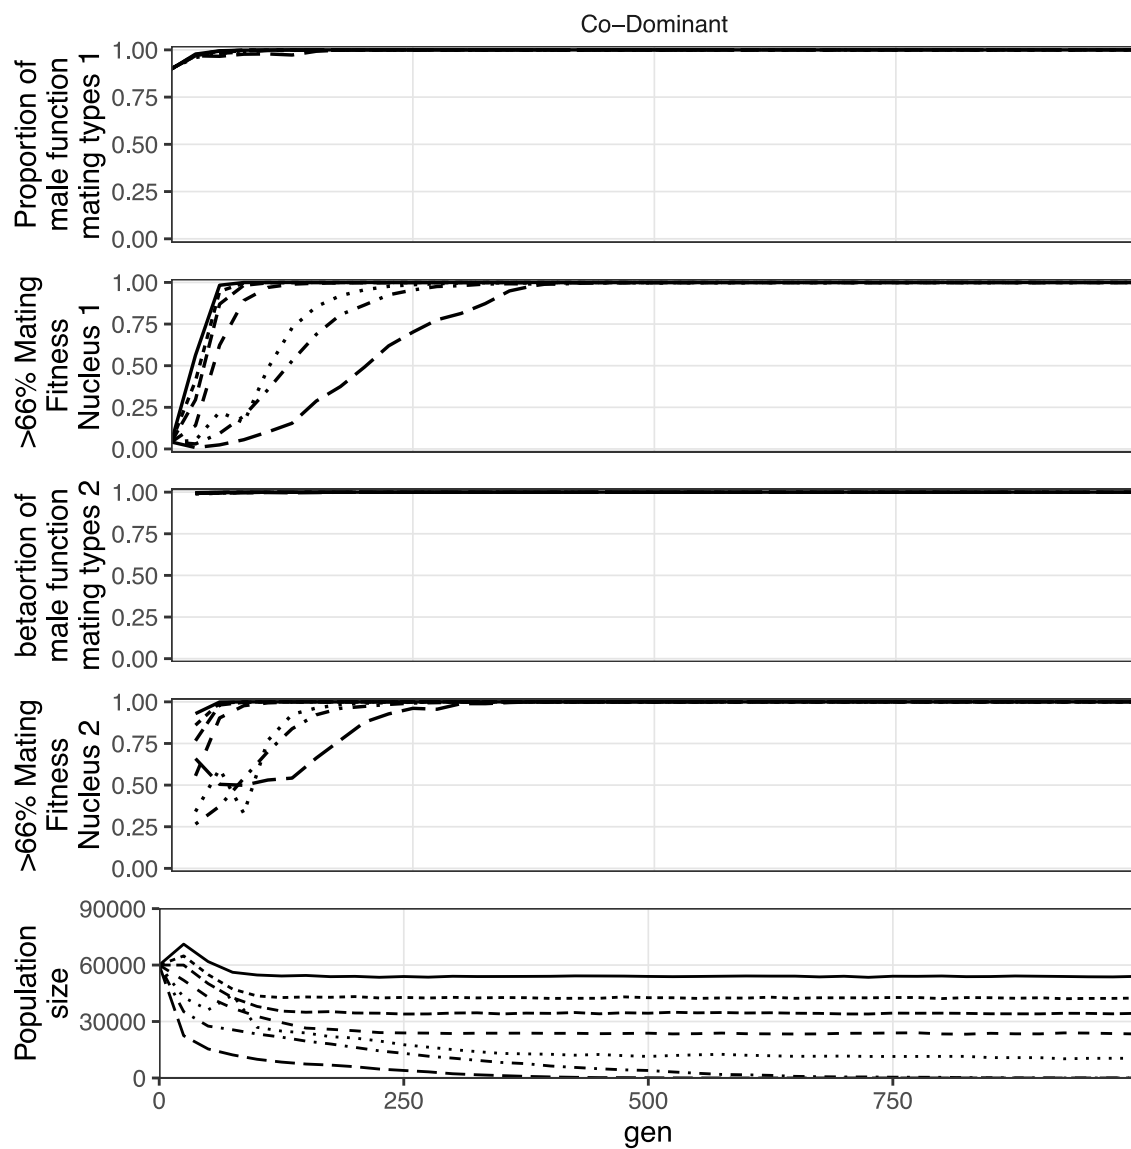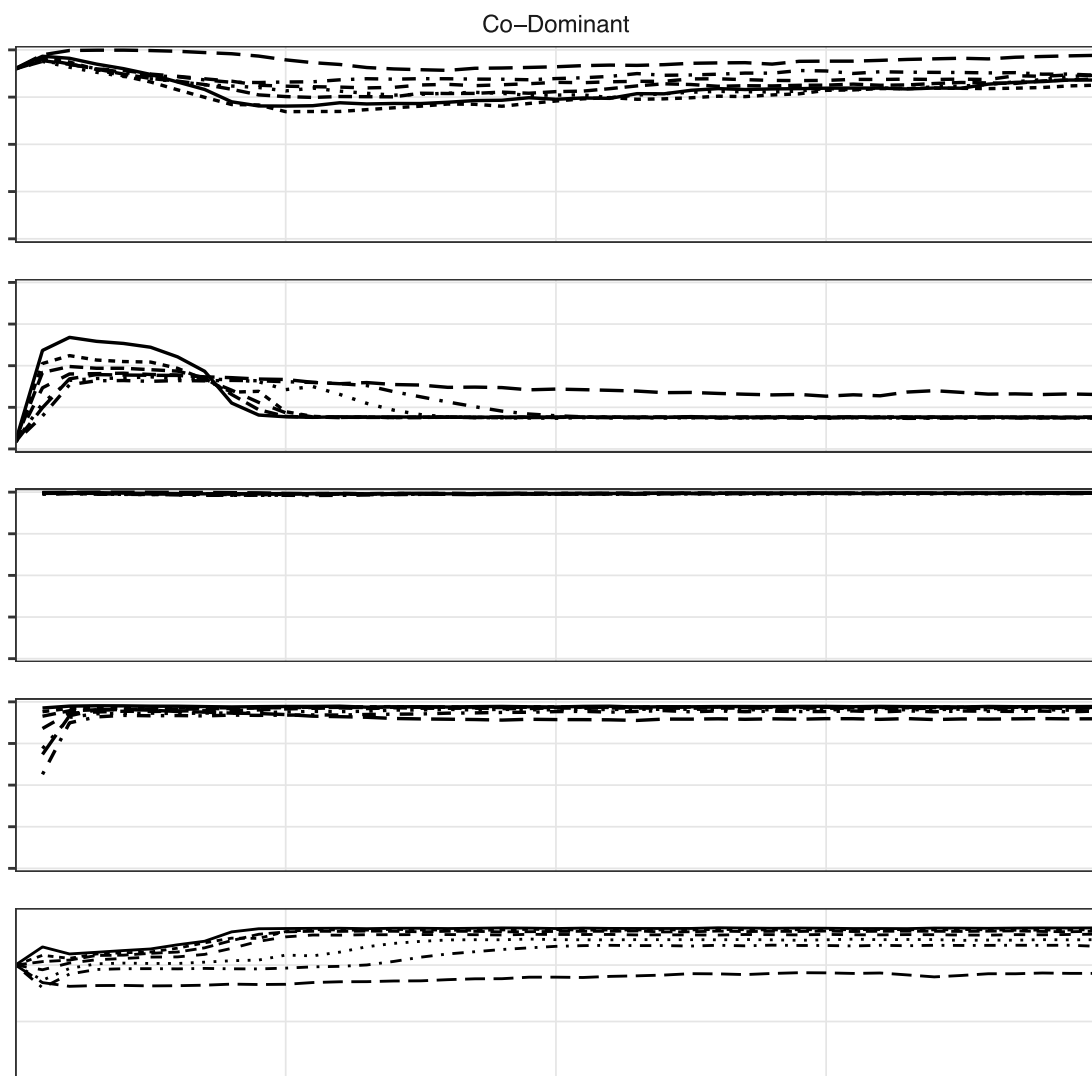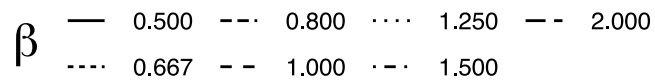

Supplement: supp [file elife_poa_e75917_Figure_4_figure_supplement_1.pdf › elife_poa_e75917_Figure_4_figure_supplement_1.pdf]
